# Supplementary material for: Synthesis of Fe-THC MOFs and functionalizing MOFs by MXenes for the selective removal of lead(ii) ions from wastewater
Source: Royal Society of Chemistry journal article supplement (doi:10.1039/d2ra08102d), 2023-01-01
Supplement: d2ra08102d1.pdf [file d2ra08102d1.pdf]

# Synthesis of Fe-THC MOFs and Functionalizing of MOFs by MXene for Selective Removal of Lead (II) Ions from Wastewater

Irfan Ijaz<sup>1</sup>, Aysha Bukhari<sup>1</sup>, Ezaz Gilani<sup>1</sup>, Ammara Nazir<sup>1</sup>, Dr. Hina Zain<sup>2</sup>

<sup>1</sup> School of Chemistry, Faculty of Basic Sciences and Mathematics, Minhaj University Lahore, Lahore 54700, Pakistan

<sup>2</sup> Department of Allied Health Sciences, Superior University Lahore, Lahore 54700, Pakistan

<sup>3</sup> Department of Chemistry, Forman Christian College Lahore, Lahore 54700, Pakistan

Corresponding Author: [iffichemixt266@gmail.com](mailto:iffichemixt266@gmail.com)

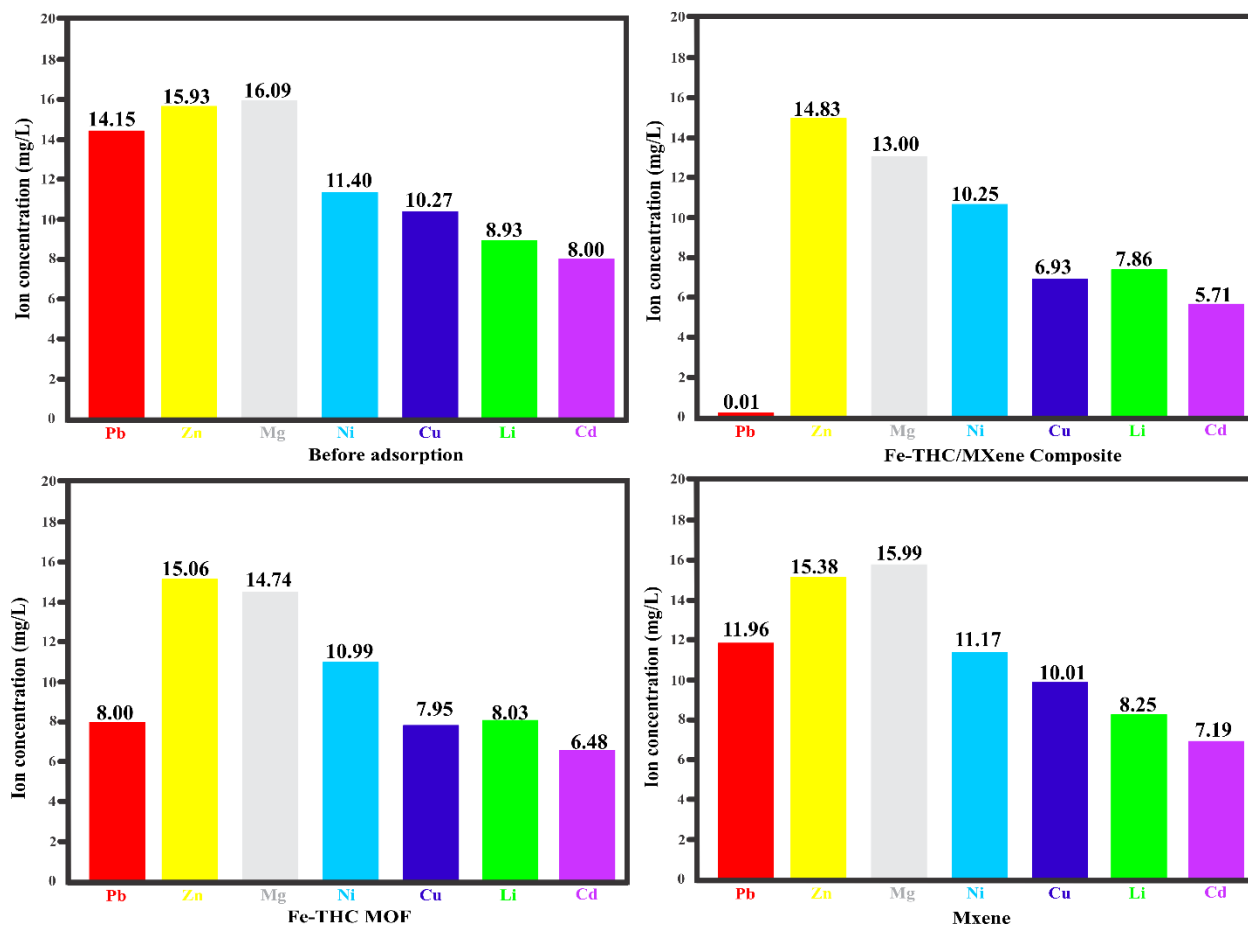

Figure S1: Selectivity of Pb<sup>2+</sup> adsorption before adsorption (a), on Fe-THC/MXene (b), Fe-THC MOFs (c), MXene (d)

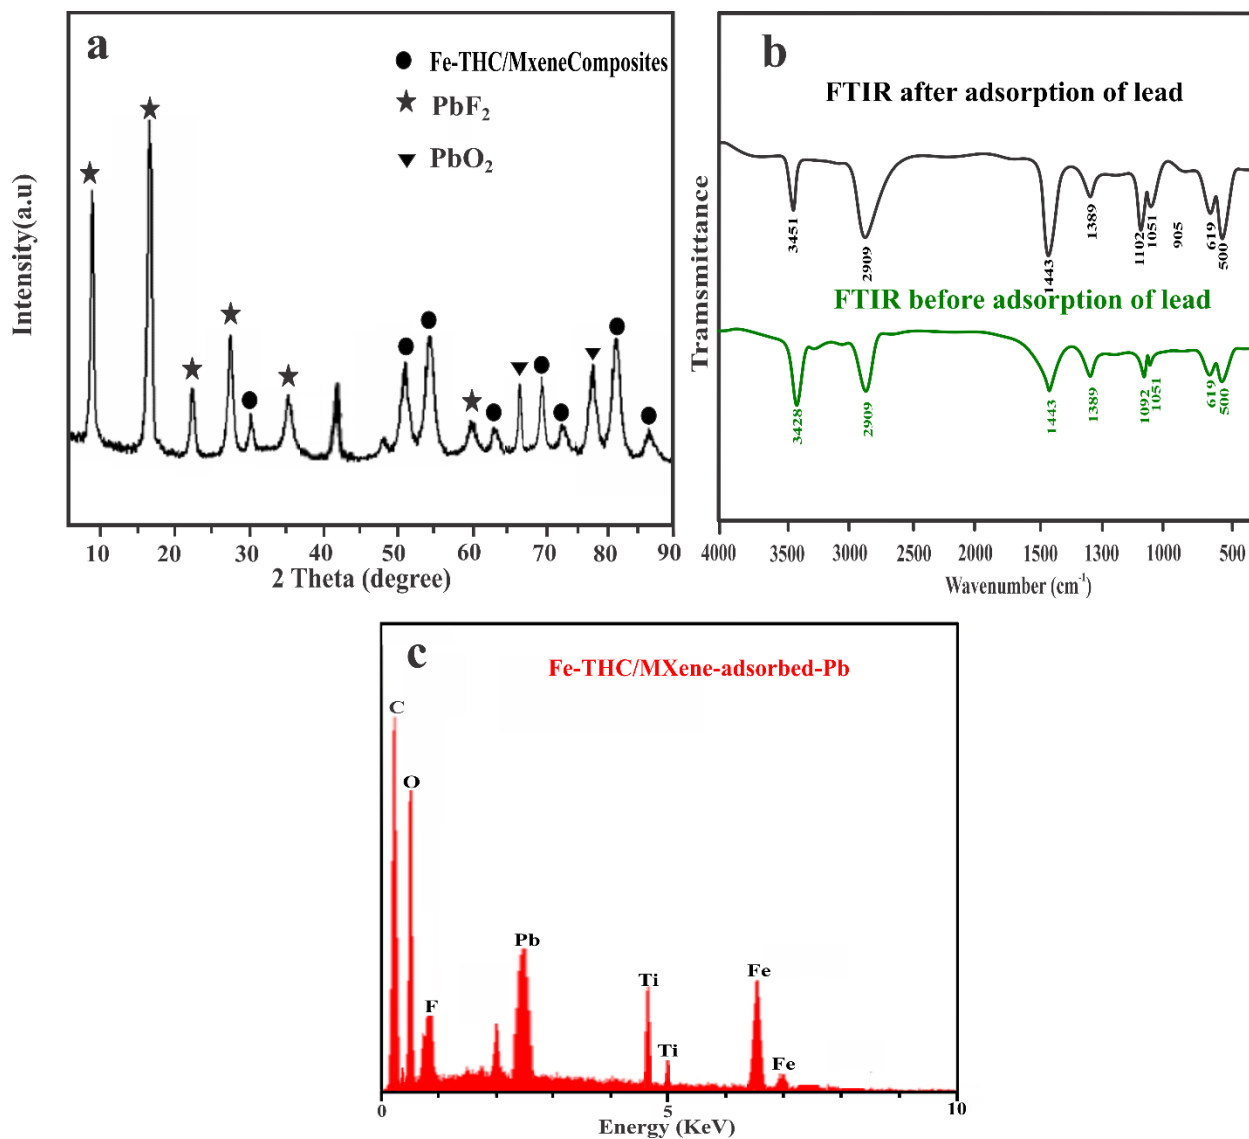

13

14

Figure.S2: XRD (a), FTIR (b), and EDX spectrums (c) of Fe-THC MOFs composites after adsorption of lead

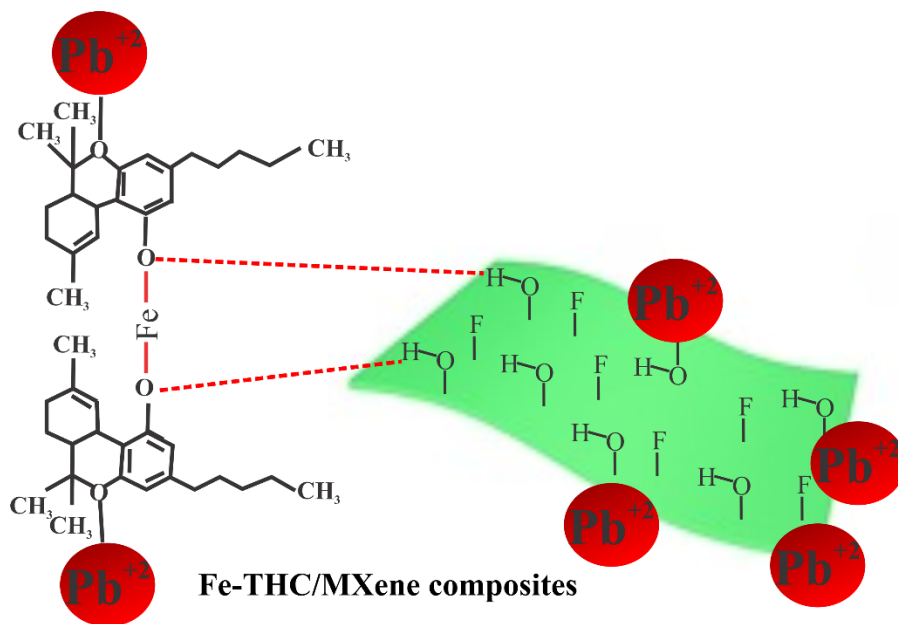

15

16

Figure.S3: Possible mechanism of adsorption of lead on the Fe-THC/Composite

17

| Kinetic Models                                           | 10 mg L <sup>-1</sup> | 20 mg L <sup>-1</sup> | 30 mg L <sup>-1</sup> |
|----------------------------------------------------------|-----------------------|-----------------------|-----------------------|
| <b>PFO</b>                                               |                       |                       |                       |
| q <sub>e</sub> (mg g <sup>-1</sup> )                     | 120.36                | 36.09                 | 11.85                 |
| K <sub>1</sub> (min <sup>-1</sup> )                      | 10.79                 | 0.0805                | 8.56                  |
| R <sup>2</sup>                                           | 0.9836                | 0.9773                | 0.9541                |
| <b>PSO</b>                                               |                       |                       |                       |
| q <sub>e</sub> (mg g <sup>-1</sup> )                     | 466.99                | 335.53                | 213.27                |
| K <sub>2</sub> [(g mg <sup>-1</sup> )min <sup>-1</sup> ] | 3.36                  | 2.88                  | 3.94                  |
| R <sup>2</sup>                                           | 0.9999                | 0.9995                | 0.9766                |

18

Table.S1: Adsorption kinetic parameters of Pb<sup>2+</sup>adsorption on Fe-THC/MXene

| Adsorbent cons<br>(mg L <sup>-1</sup> ) | R <sup>2</sup> |                 |                 |                 | C (mg/g) |                |                |                | K (mg/g-min <sup>0.5</sup> ) |                |                |                |
|-----------------------------------------|----------------|-----------------|-----------------|-----------------|----------|----------------|----------------|----------------|------------------------------|----------------|----------------|----------------|
|                                         | Total          | 1R <sup>2</sup> | 2R <sup>2</sup> | 3R <sup>2</sup> | Total    | C <sub>1</sub> | C <sub>2</sub> | C <sub>3</sub> | Total                        | K <sub>1</sub> | K <sub>2</sub> | K <sub>3</sub> |
| 10 mg L <sup>-1</sup>                   | 0.56           | 0.97            | 0.82            | 0.78            | 89.9     | 8.32           | 8.67           | 9.36           | 0.03                         | 0.29           | 0.08           | 0.02           |

|                       |      |      |      |      |       |       |       |       |      |      |      |      |
|-----------------------|------|------|------|------|-------|-------|-------|-------|------|------|------|------|
| 20 mg L <sup>-1</sup> | 0.60 | 0.99 | 0.93 | 0.62 | 12.64 | 13.53 | 7.39  | 15.6  | 0.30 | 0.36 | 0.19 | 0.04 |
| 30 mg L <sup>-1</sup> | 0.78 | 1.0  | 0.97 | 0.57 | 15.66 | 12.30 | 19.46 | 18.62 | 0.29 | 1.36 | 0.49 | 0.08 |

19

Table.S2: Intra-particle diffusion kinetic parameters of Pb<sup>2+</sup>adsorption on Fe-THC/MXene

| <b>Isothermal model</b> | <b>Para meters</b>                     | <b>305 K</b> | <b>310 K</b> | <b>315 K</b> |
|-------------------------|----------------------------------------|--------------|--------------|--------------|
| <b>Langmuir</b>         | $q_{m \text{ exp}} (\text{mg g}^{-1})$ | 680          | 298          | 84           |
|                         | $q_{m \text{ cal}} (\text{mg g}^{-1})$ | 674          | 293          | 77           |
|                         | $K_L$                                  | 0.1680       | 0.3543       | 0.1268       |
|                         | $R^2$                                  | 0.9999       | 0.9986       | 0.9939       |
| <b>Freundlich</b>       | $K_F \text{ exp} (\text{mg g}^{-1})$   | 160          | 50           | 20           |
|                         | $K_F \text{ cal} (\text{mg g}^{-1})$   | 148          | 39           | 17           |
|                         | $n$                                    | 3.51         | 0.622        | 2.59         |
|                         | $R^2$                                  | 0.9820       | 0.9563       | 0.81         |
|                         | <b>Temkin</b>                          |              |              |              |
|                         | $K_T$                                  | 0.12         | 17.26        | 1.91         |
|                         | $B$                                    | 123          | 45.99        | 6.469        |
|                         | $R^2$                                  | 0.9885       | 0.9636       | 0.9203       |

20

Table.S3: Adsorption isotherm parameters of Pb<sup>2+</sup>adsorption time on Fe-THC/MXene

| <b>Temperature (K)</b> | $\Delta G(\text{KJ mol}^{-1})$ | $\Delta H(\text{KJ mol}^{-1}\text{K}^{-1})$ | $\Delta S(\text{K mol}^{-1})$ |
|------------------------|--------------------------------|---------------------------------------------|-------------------------------|
| 305 K                  | -8.539                         | -40.365                                     | -0.359                        |
| 310 K                  | -4.688                         |                                             |                               |
| 315 K                  | -2.967                         |                                             |                               |

21

Table.S4: Thermodynamic parameters of Pb<sup>2+</sup>adsorption on Fe-THC/MXene

|                         | <b>Fe-THC/MXene composite</b> |          | <b>Fe-THC MOFs</b>      |          | <b>MXene</b>            |          |
|-------------------------|-------------------------------|----------|-------------------------|----------|-------------------------|----------|
| <b>Heavy metals ion</b> | $K_Q(\text{mL g}^{-1})$       | <b>K</b> | $K_Q(\text{mL g}^{-1})$ | <b>K</b> | $K_Q(\text{mL g}^{-1})$ | <b>K</b> |

|         |           |          |          |          |       |        |
|---------|-----------|----------|----------|----------|-------|--------|
| Pb (II) | 19, 206.6 | 21,935.9 | 12,403.2 | 13,967.9 | 750.0 | 1347.2 |
| Zn (II) | 93.9      | 112.3    | 89.8     | 96.1     | 68.8  | 73.7   |
| Mg (II) | 87.4      | 107.3    | 74.2     | 91.9     | 57.4  | 68.7   |
| Ni(I)   | 56.5      | 196.0    | 49.9     | 148.5    | 33.6  | 98.4   |
| Cu (II) | 33.9      | 218.2    | 29.5     | 79.3     | 17.69 | 59.5   |
| Cd (II) | 25.8      | 92.7     | 17.0     | 63.7     | 10.0  | 49.6   |
| Li (I)  | 12.5      | 59.9     | 4.88     | 42.6     | 3.7   | 18.2   |

22

Table.S5: Selectivity parameters of Pb<sup>2+</sup>adsorption on Fe-THC/MXene

| Adsorbents                        | Temperature | Equilibrium<br>time | pH  | q <sub>e</sub> (mg/g) | References |
|-----------------------------------|-------------|---------------------|-----|-----------------------|------------|
| nFe@ZIF-8<br>composite            | 313K        | 60 min              | 5   | 175.43                | [54]       |
| Melamine-<br>modified Zr-<br>MOFs | 313K        | 120                 | 5   | 122.0                 | [55]       |
| CAU-7-TATB                        | -           | 45                  | 5   | 63                    | [56]       |
| FSAC                              | 398         |                     | 4   | 80.6                  | [57]       |
| MIL-<br>101(Fe)/GO                | -           | 15                  | 6   | 128.6                 | [58]       |
| Fe-<br>THC/MXene                  | 305K        | 12                  | 4.5 | 674                   | This Work  |

23

Table.S6: Comparative study with previous literature

24

25

26
